Correction

# Correction: The Impact of Policy Guidelines on Hospital Antibiotic Use over a Decade: A Segmented Time Series Analysis

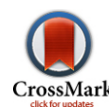

The PLOS ONE Staff

There is an error in Table 3. In the first column, there is a spacing error that resulted in merged rows. Please see the corrected Table 3 here.

**Table 3.** Pair-wise segmented analysis as the estimated rate of change in monthly DDD/100 bed days for adjacent segments and predicted values for the start of the *i*-segment, start and end of the *i*+1-segment.

| S* | Slopes (SE) for two adjacent <i>i</i> -segment and <i>i</i> +1-segments | Predicted values for the start of the <i>i</i> -segment, start and end of the <i>i</i> +1-segment | R <sup>2</sup> | <i>p</i> value** |
|----|-------------------------------------------------------------------------|---------------------------------------------------------------------------------------------------|----------------|------------------|
| 1  | 0.708 (0.120)                                                           | 57.88, 74.23 and 73.01                                                                            | 0.61           | <0.001           |
| 2  | 0.010 (0.107)                                                           |                                                                                                   |                | 0.926            |
| 2  | 0.265 (0.088)                                                           | 71.32, 77.35 and 89.39                                                                            | 0.73           | 0.004            |
| 3  | 0.362 (0.050)                                                           |                                                                                                   |                | <0.001           |
| 3  | 0.362 (0.050)                                                           | 79.70, 89.58 and 90.63                                                                            | 0.59           | <0.001           |
| 4  | 0.036 (0.075)                                                           |                                                                                                   |                | 0.629            |
| 4  | 0.067 (0.072)                                                           | 89.15, 90.35 and 79.31                                                                            | 0.55           | 0.357            |
| 5  | -0.401(0.089)                                                           |                                                                                                   |                | <0.001           |

\*S - Segment

\*\**p* values reflect the results of standard z-test for a linear trend for *i*-segment and *i*+1 segments, respectively; *p*-values below 0.05 are italicized.

doi:10.1371/journal.pone.0092206.t003

## Reference

- Chandy SJ, Naik GS, Charles R, Jeyaseelan V, Naumova EN, et al. (2014) The Impact of Policy Guidelines on Hospital Antibiotic Use over a Decade: A Segmented Time Series Analysis. PLoS ONE 9(3): e92206. doi:10.1371/journal.pone.0092206

**Citation:** The PLOS ONE Staff (2014) Correction: The Impact of Policy Guidelines on Hospital Antibiotic Use over a Decade: A Segmented Time Series Analysis. PLoS ONE 9(7): e102193. doi:10.1371/journal.pone.0102193

**Published:** July 1, 2014

**Copyright:** © 2014 The PLOS ONE Staff. This is an open-access article distributed under the terms of the Creative Commons Attribution License, which permits unrestricted use, distribution, and reproduction in any medium, provided the original author and source are credited.
